# Supplementary material for: Mammographic density adds accuracy to both the Tyrer-Cuzick and Gail breast cancer risk models in a prospective UK screening cohort
Source: Springer Nature journal article supplement (doi:10.1186/s13058-015-0653-5), 2015-12-01
Supplement: MOESM1 [file 9781596]

## Additional material

### Appendix

#### Density residual

The approach to adjust for age and BMI formed a density residual  $r_i$  for each woman  $i=1, \dots, n$  of the form

$$r_i = z_i - (a + b_1x_{i1} + b_2x_{i2} + b_3x_{i3})$$

where  $a, b_1, b_2$ , and  $b_3$  are regression parameters;  $x_{i1}$  = age minus 47,  $x_{i2}$  = BMI minus 27.5

(mean BMI), and  $x_{i3}=1$  if a digital mammogram was used and 0 otherwise. Percent density  $d_i$

was included through the transformation from Warwick *et al.* [25] of  $t_i = \log\{ d_i^* / (1-d_i^*) \}$

where  $d_i^* = (0.025+0.95 d_i)^{0.5}$  and  $z_i = t_i / \text{sd}(t)$  was normalised to have unit variance by

dividing by the observed standard deviation (sd). The density residual was obtained by fitting

the linear regression model to the cohort by ordinary least squares. Age and mammogram type

were available for all women, and missing BMI was dropped from estimation; mean BMI

(27.5) was imputed for these women to obtain their residual. The point estimate of the

intercept  $a = 0.263$ , age parameter  $b_1 = -0.019$ , BMI parameter  $b_2 = -0.046$  and type of

mammogram parameter  $b_3 = 0.119$ .

## Supplementary Table

Table S1: Univariate and multivariate performance of breast density and the Tyrer-Cuzick and Gail risk models, sub-group analysis by time of cancer diagnosis. Three cancers where date of diagnosis was not available are excluded. The odds ratio is for the difference between the upper and lower quartiles in the cohort.

| Factor                   | N (no BC) | (BC) | OR (95% CI)        | LR- $\chi^2$ | AUC (95% CI)     | P        |
|--------------------------|-----------|------|--------------------|--------------|------------------|----------|
| <i>(i) &lt; 100 days</i> |           |      |                    |              |                  |          |
| <b>(a) Univariate</b>    |           |      |                    |              |                  |          |
| Gail 10-yr               | 49931     | 556  | 1.20 (1.09 - 1.32) | 12.7         | 0.54 (0.51-0.56) | 3.72e-04 |
| T-C 10-yr                | 49931     | 556  | 1.37 (1.25 - 1.51) | 41.5         | 0.57 (0.55-0.60) | 1.17e-10 |
| Density (%)              | 49931     | 556  | 1.33 (1.19 - 1.48) | 24.6         | 0.57 (0.55-0.59) | 7.09e-07 |
| - digital                | 41496     | 434  | 1.34 (1.18 - 1.51) | 19.8         | 0.57 (0.54-0.59) | 8.39e-06 |
| - other                  | 8435      | 122  | 1.24 (0.96 - 1.58) | 2.8          | 0.55 (0.50-0.60) | 9.6e-02  |
| DR                       | 49931     | 556  | 1.48 (1.32 - 1.64) | 48.2         | 0.59 (0.56-0.61) | 3.78e-12 |
| <b>(b) Multivariate</b>  |           |      |                    |              |                  |          |
| Gail 10-yr               | 49931     | 556  | 1.18 (1.07 - 1.30) | 12.7         | 0.55 (0.52-0.57) | 3.72e-04 |
| DR with Gail             |           |      | 1.47 (1.31 - 1.63) | 46.2         | 0.59 (0.57-0.61) | 1.06e-11 |
| T-C 10-yr                | 49931     | 556  | 1.35 (1.22 - 1.48) | 41.5         | 0.57 (0.55-0.59) | 1.17e-10 |
| DR with T-C              |           |      | 1.45 (1.30 - 1.61) | 42.8         | 0.61 (0.59-0.63) | 5.95e-11 |
| <i>(ii) 100 days+</i>    |           |      |                    |              |                  |          |
| <b>(a) Univariate</b>    |           |      |                    |              |                  |          |
| Gail 10-yr               | 49931     | 138  | 1.35 (1.11 - 1.62) | 9.0          | 0.58 (0.53-0.62) | 2.63e-03 |
| T-C 10-yr                | 49931     | 138  | 1.36 (1.12 - 1.63) | 9.5          | 0.58 (0.54-0.63) | 2.1e-03  |
| Density (%)              | 49931     | 138  | 1.22 (0.97 - 1.52) | 2.9          | 0.54 (0.50-0.59) | 8.79e-02 |
| - digital                | 41496     | 116  | 1.27 (0.99 - 1.61) | 3.6          | 0.55 (0.50-0.60) | 5.92e-02 |
| - other                  | 8435      | 22   | 1.05 (0.56 - 1.86) | 0.0          | 0.51 (0.38-0.63) | 8.75e-01 |
| DR                       | 49931     | 138  | 1.49 (1.20 - 1.85) | 12.8         | 0.59 (0.54-0.63) | 3.39e-04 |
| <b>(b) Multivariate</b>  |           |      |                    |              |                  |          |
| Gail 10-yr               | 49931     | 138  | 1.33 (1.10 - 1.60) | 9.0          | 0.55 (0.52-0.57) | 2.63e-03 |
| DR with Gail             |           |      | 1.48 (1.19 - 1.83) | 12.0         | 0.59 (0.57-0.61) | 5.41e-04 |
| T-C 10-yr                | 49931     | 138  | 1.33 (1.09 - 1.60) | 9.5          | 0.57 (0.55-0.59) | 2.1e-03  |
| DR with T-C              |           |      | 1.46 (1.18 - 1.81) | 11.5         | 0.61 (0.59-0.63) | 6.91e-04 |

T-C: Tyrer-Cuzick; DR: Density residual
